# Supplementary material for: High-throughput functionalization of the Toxoplasma kinome uncovers a novel regulator of invasion and egress
Source: bioRxiv or medRxiv preprint supplement (doi:10.1101/2021.09.23.461611), 2021-09-24
Supplement: Supplementary file [file media-1.pdf]

# High-throughput functionalization of the *Toxoplasma* kinome uncovers a novel regulator of invasion and egress

Tyler A. Smith<sup>1,2</sup>, Gabriella S. Lopez-Perez<sup>2</sup>, Emily Shortt<sup>1</sup>, Sebastian Lourido<sup>1,2,\*</sup>

<sup>1</sup> Whitehead Institute for Biomedical Research, Cambridge, MA 02142, USA

<sup>2</sup> Department of Biology, Massachusetts Institute of Technology, Cambridge, MA 02139, USA

\* Correspondence: [lourido@wi.mit.edu](mailto:lourido@wi.mit.edu)

## SUPPLEMENTAL TABLES

**Table S1.** Combined results from the HiT screens summarizing data from arrayed and pooled analyses.

**Table S2.** Oligos and plasmids used in this study.

## SUPPLEMENTAL FIGURES

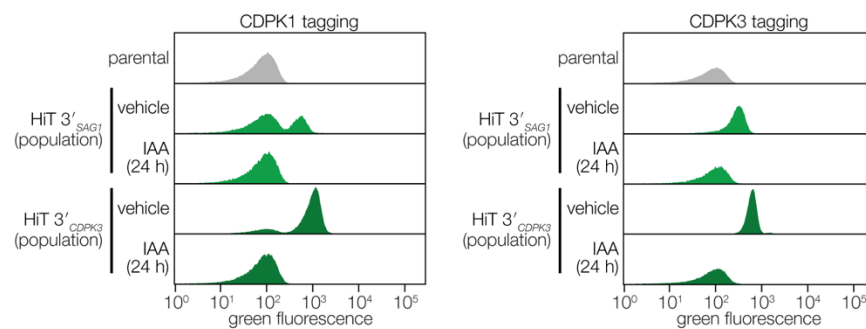

**Figure S1. HiT vector-transfected populations are IAA-responsive.** IAA regulation of HiT vector-transfected populations. Transfected populations were treated with IAA or PBS 3 hours post-infection. After 24 hours of IAA or PBS treatment populations were analyzed by flow cytometry.

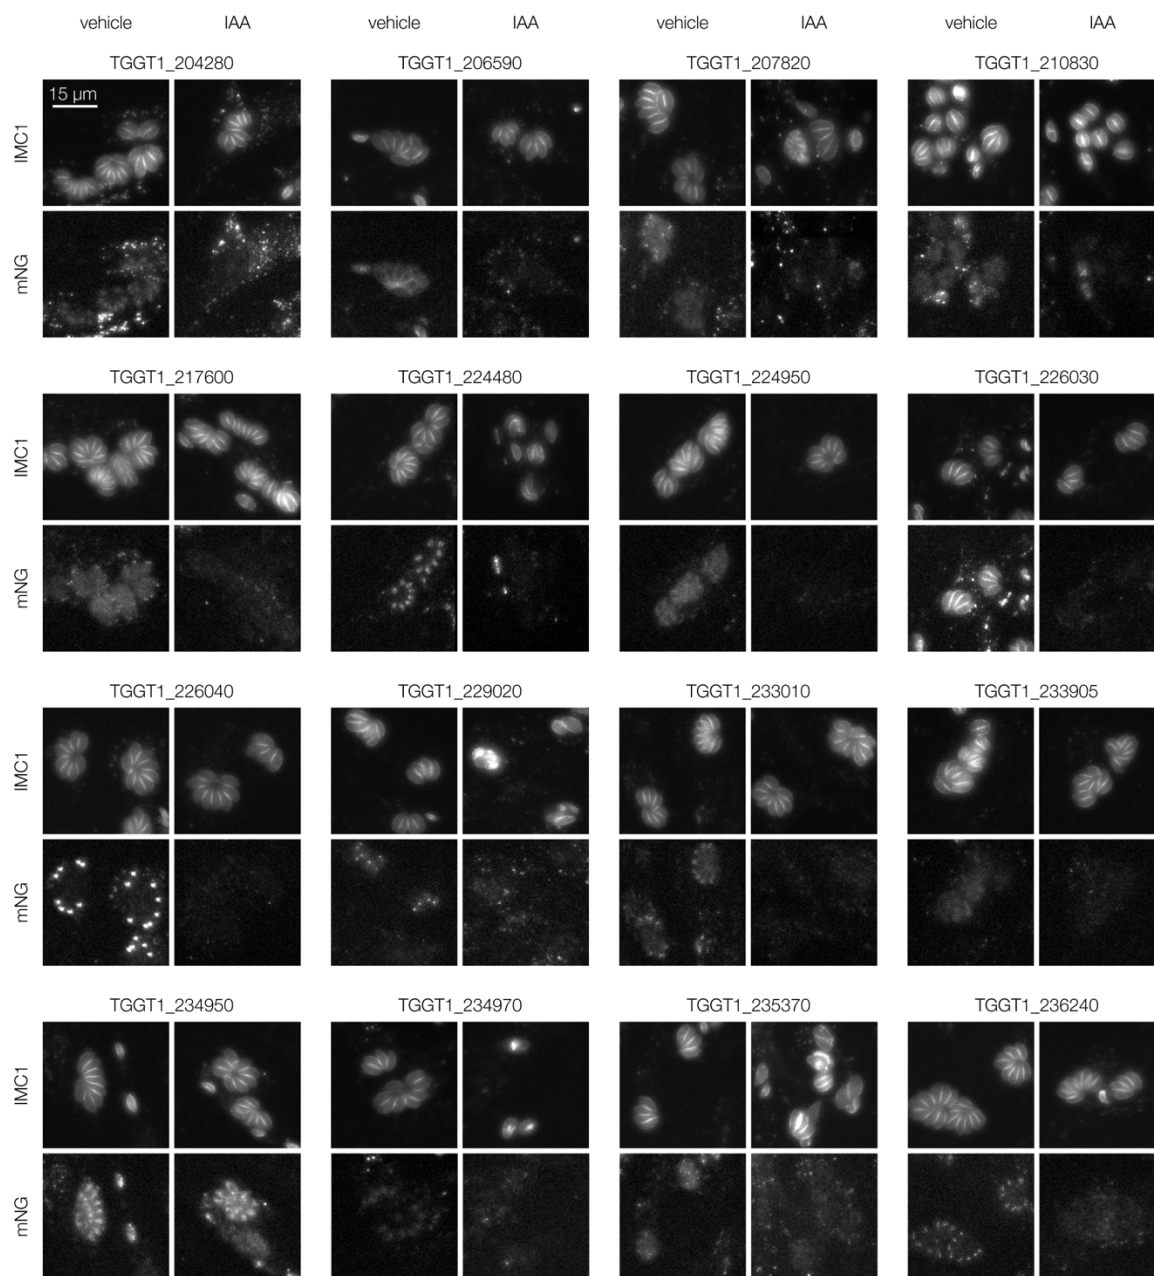

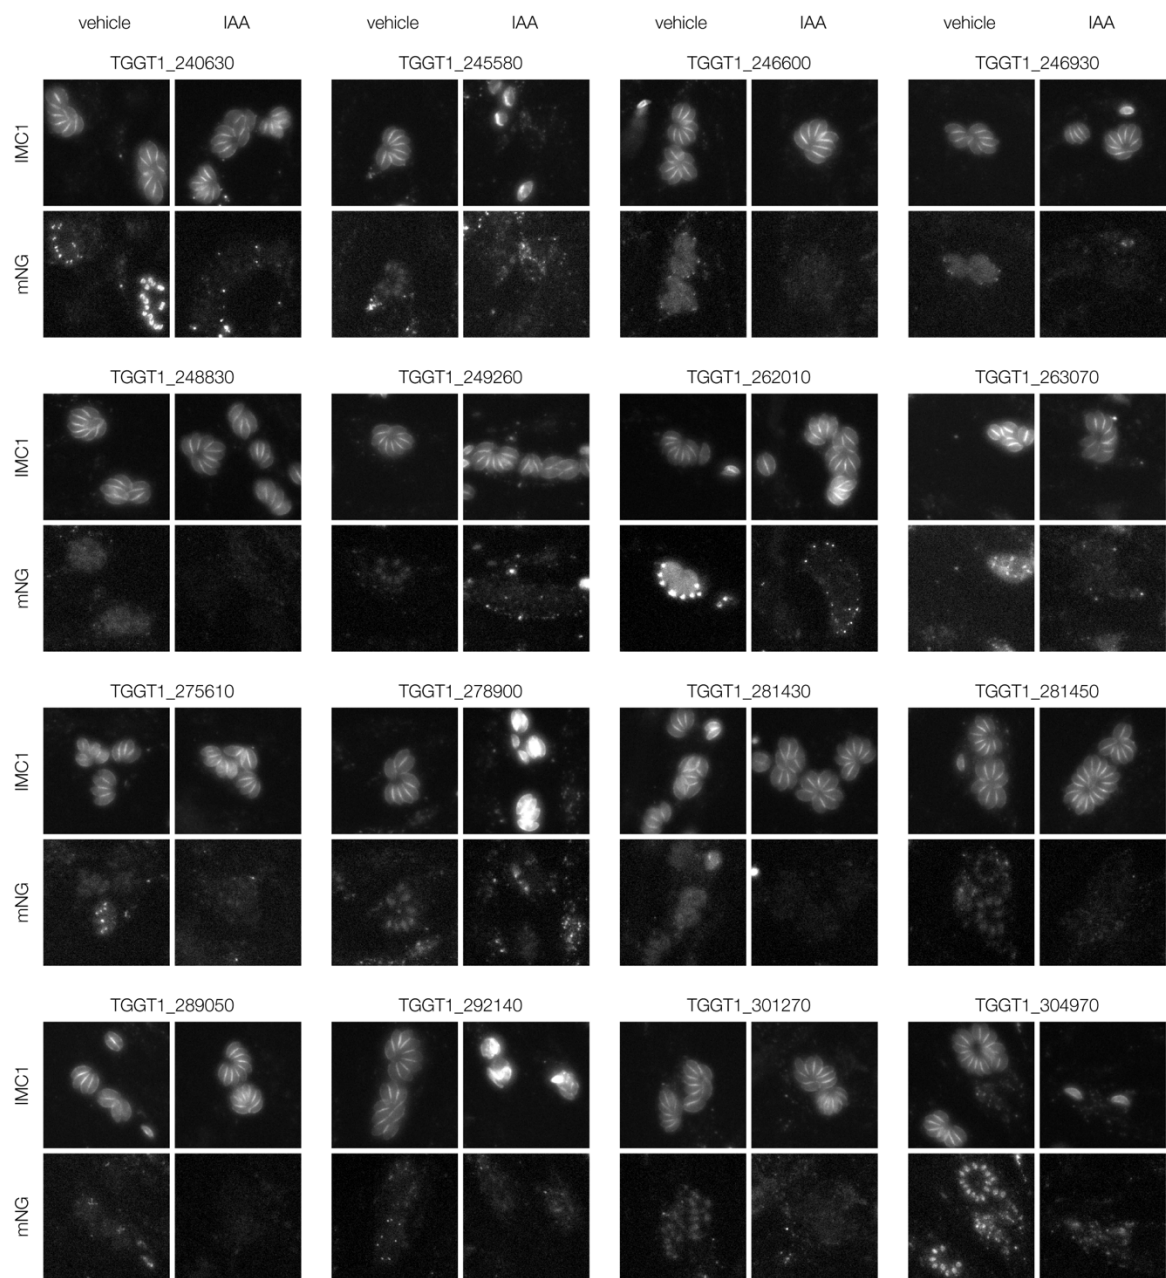

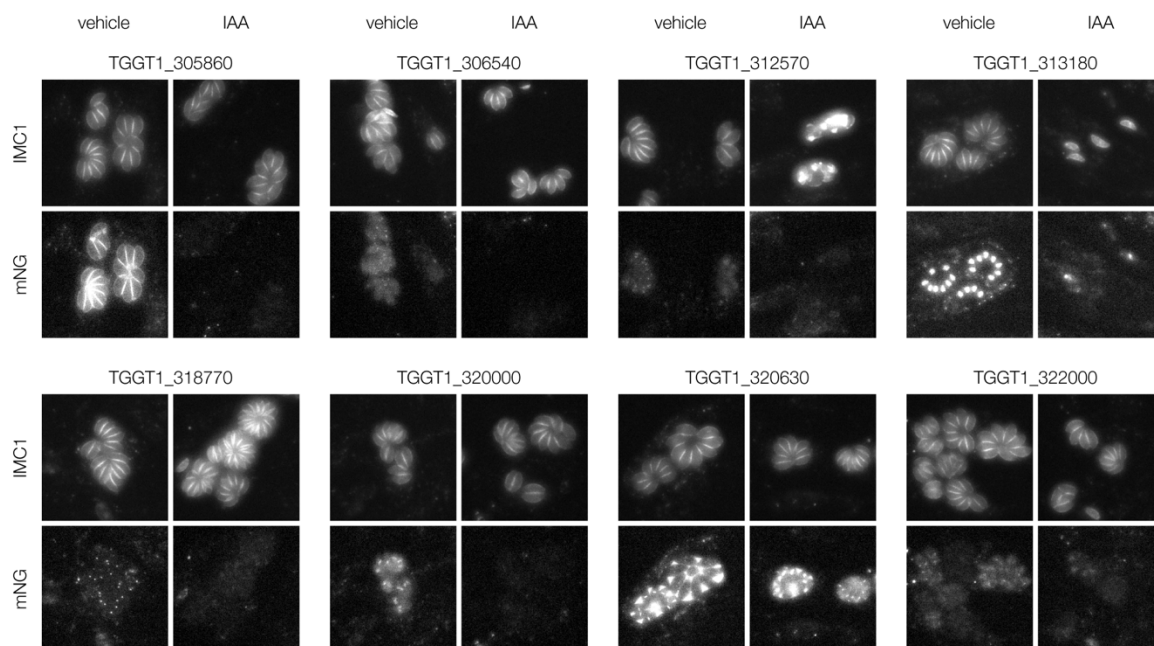

**Figure S2. Representative images of assigned localizations within the array by widefield microscopy.** Widefield microscopy of representative clones with assigned localizations. Localizations were assigned to a gene if half or more of single-integrated wells for that gene displayed consistent localizations. The maximum IMC1-tdTomato and mNeonGreen markers are displayed for cultures treated with either IAA or vehicle for 24 hours.

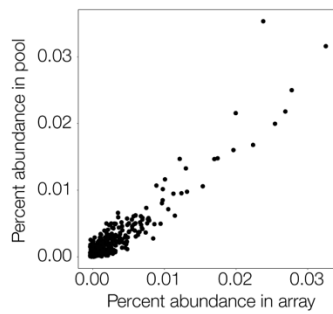

**Figure S3. Abundance of gRNAs captured in the array correlates strongly with their presence in the pooled population.** Percent abundance of each gRNA captured in the array versus the percent abundance of each gRNA in the pooled population from which they were subcloned. Spearman correlation coefficient = 0.77.

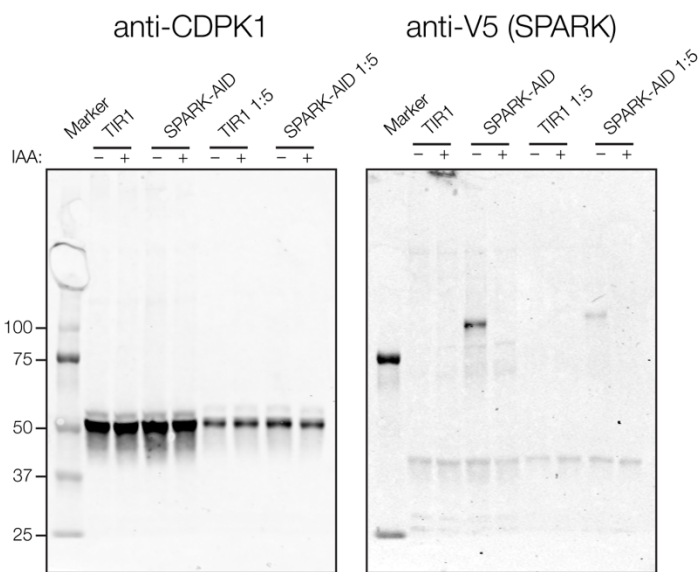

**Figure S4. SPARK-AID depletion monitored by immunoblot.** Full immunoblot from Figure 5D. SPARK-AID was detected using an anti-V5 antibody and CDPK1 was used as a loading control.

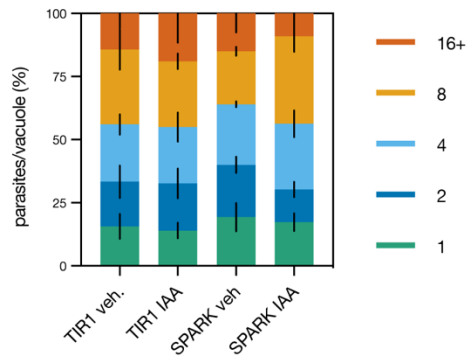

**Figure S5. Knockdown of SPARK does not lead to a replication defect.** Replication assay of SPARK-AID parasites. Parasites were treated with either IAA or vehicle at 3 hours post-invasion and incubated for 24 hours. Parasites were stained and imaged as 4x4 fields. The number of parasites per vacuole were counted until 100 vacuoles had been counted for a given sample. (N=3).

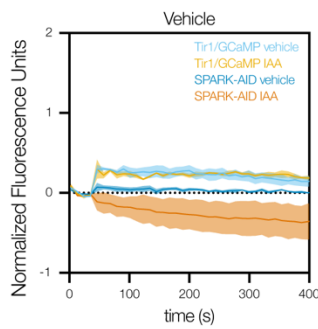

**Figure S6. Vehicle-treated extracellular GCaMP6f/SPARK-AID parasites in basal  $\text{Ca}^{2+}$  buffer.** Vehicle trace from **Figure 5I**. Extracellular parasites were treated with vehicle and the fluorescence response was quantified and normalized as previously described.
